# Supplementary material for: Geochronology and Geochemistry of the Xianghualing Granitic Rocks: Insights into Multi-Stage Sn-Polymetallic Mineralization in South China
Source: MDPI journal article supplement (doi:10.3390/min12091091), 2022-08-29
Supplement: s1 [file s1]

### 1. The Analytical Procedures of XRF and ICP-MS for Whole-Rock Major- and Trace Elements

XRF: Prepared samples were fused with lithium metaborate-lithium tetraborate flux which also included lithium nitrate as an oxidizing agent, and then poured into a platinum mold to generate a fused disk for XRF analysis. Loss-on-ignition (LOI) at 1000 °C was measured for each sample, and elemental concentrations were calculated from the results of both analyses.

ICP-MS: Prepared samples were added to lithium metaborate/lithium tetraborate flux, mixed well and fused in a furnace at 1025 °C. The resulting melts were then cooled and dissolved in a mixture of nitric, hydrochloric and hydrofluoric acids prior to analysis.

### 2. The Processes of Zircon Cathodoluminescent (CL) Images

Zircon CL images were obtained at the Wuhan SampleSolution Analytical Technology Co., Ltd., Wuhan, China, using an Analytical Scanning Electron Microscope (JSM-IT300) connected to a Delmic sparc system. The imaging condition was 0.5–30 kV voltage of electric field and 72  $\mu$ A current of tungsten filament.

### 3. The Analytical Procedures and Data Processing Processes of LA-ICP-MS for Zircon U–Pb and Trace Element Measurements

Laser sampling was performed using an excimer laser ablation system consisting of a GeoLas 2005 with an Agilent 7500a ICPMS used to acquire ion-signal intensities. Laser energy and frequency were 70 mJ and 8 Hz, respectively. The beam diameter is 32  $\mu$ m for most zircons, with a 24  $\mu$ m used for small grains (< 50  $\mu$ m wide). Standards were run at the same spot size as the samples. Helium was used as the carrier gas with argon used as the make-up gas and mixed with the carrier gas via a T-connector before entering the ICP-MS. Nitrogen was added into the central gas flow (Ar+He) of the Ar plasma to decrease the detection limits and improve precision [1]. Each analysis incorporated a background acquisition interval of ~20–30 s (gas blank) followed by a 40 s data acquisition interval for the 32  $\mu$ m spots and 30 s for the 24  $\mu$ m spots. Zircon 91500 was used as the external standard for U–Pb dating, (preferred U–Th–Pb isotopic ratios from [2], and was analyzed twice for every five unknowns. Time-dependent drift was corrected using a linear interpolation (with time) for every five analyses according to variations of 91500. In addition, zircon standard GJ-1 was analyzed as secondary standard. The weighted mean  $^{206}\text{Pb}/^{238}\text{U}$  age for GJ-1 was  $598.5 \pm 4.35$  Ma ( $2\sigma$ ,  $n = 10$ ), consistent with the recommended values within uncertainty ( $599.81 \pm 1.7$  Ma ( $2\sigma$ )) [3]. Every 10 unknown analysis was followed by one analysis of NIST SRM 610 to correct the time-dependent drift of sensitivity and mass discrimination for the trace-element analysis. Trace-element compositions of zircons were calibrated against multiple reference materials (BCR-2G and BIR-1G), combined with internal standardization ( $^{29}\text{Si}$ , assumed 32.7 %  $\text{SiO}_2$  assumed for zircon unknowns). Detailed analytical conditions and procedures for zircon U–Pb LA-ICPMS dating are described in Liu et al. (2010) [4]. Off-line selection and integration of background and analytical signals, time-drift correction, and quantitative calibration for zircon U–Pb dating and trace-element compositions were performed using ICPMSDataCal 8.3. Common Pb was corrected based on the method proposed by Andersen (2002) [5] with concordia diagrams and weighted mean calculations made using Isoplot 4.5 [6].

#### References:

1. Hu, Z.C.; Gao, S.; Liu, Y.S.; Hu, S.H.; Chen, H.H.; Yuan, H.L. Signal enhancement in laser ablation ICP-MS by addition of nitrogen in the central channel gas. *Journal of Analytical Atomic Spectrometry* **2008**, *23*, 1093–1101.
2. Wiedenbeck, M.; Hanchar, J.M.; Peck, W.H.; Sylvester, P.; Valley, J.; Whitehouse, M.; Kronz, A.; Morishita, Y.; Nasdala, L.; Fiebig, J.; Franchi, I.; Girard, J.P.; Greenwood, R.C.; Hinton, R.; Kita, N.; Mason, P.R.D.; Norman, M.; Ogasawara, M.; Piccoli, P.M.; Rhede, D.; Satoh, H.; Schulz-Dobrick, B.; Skar, O.; Spicuzza, M.J.; Terada, K.; Tindle,

- A.; Togashi, S.; Vennemann, T.; Xie, Q.; Zheng, Y.F. Further characterisation of the 91500 zircon crystal. *Geostandards and Geoanalytical Research* **2004**, *28*, 9–39.
3. Jackson, S.E.; Pearson, N.J.; Griffin, W.L.; Belousova, E.A. The application of laser ablation-inductively coupled plasma-mass spectrometry to in situ U–Pb zircon geochronology. *Chemical Geology* **2004**, *211*, 47–69.
  4. Liu, Y.S.; Hu, Z.C.; Zong, K.Q.; Gao, C.G.; Gao, S.; Xu, J.; Chen, H.H. Reappraisal and refinement of zircon U–Pb isotope and trace element analyses by LA-ICP-MS. *Chinese Science Bulletin* **2010**, *55*, 1535–1546.
  5. Andersen, T. Correction of common lead in U–Pb analyses that do not report  $^{204}\text{Pb}$ . *Chemical Geology* **2002**, *192*, 59–79.
  6. Ludwig, K.R. User's Manual for Isoplot 3.00: A Geochronological Toolkit for Microsoft Excel. *Berkeley Geochronology Center Special Publication* **2003**, No. 4, 70 pp.
